# Supplementary material for: Evidence for the Direct Effect of the NPFF Peptide on the Expression of Feeding-Related Factors in Spotted Sea Bass (Lateolabrax maculatus)
Source: PubMed Central journal article supplement (PMC6691130; doi:10.3389/fendo.2019.00545), 2019-08-06
Supplement: Image_1.pdf [file Image_1.pdf]

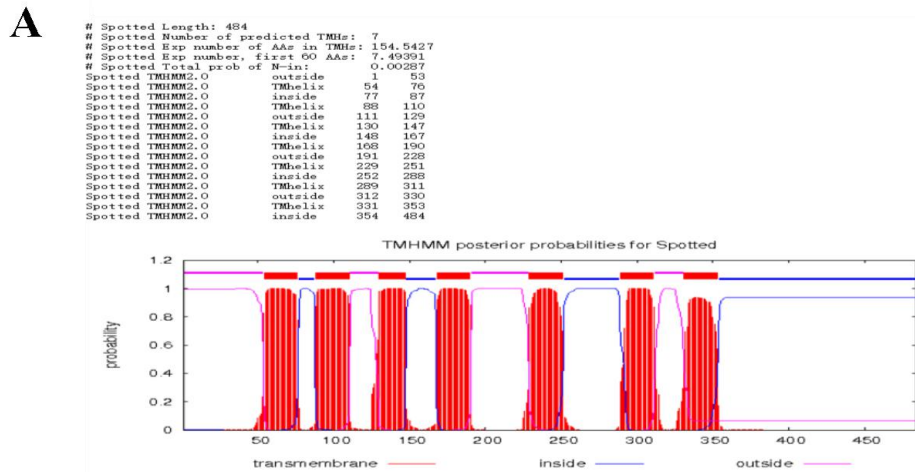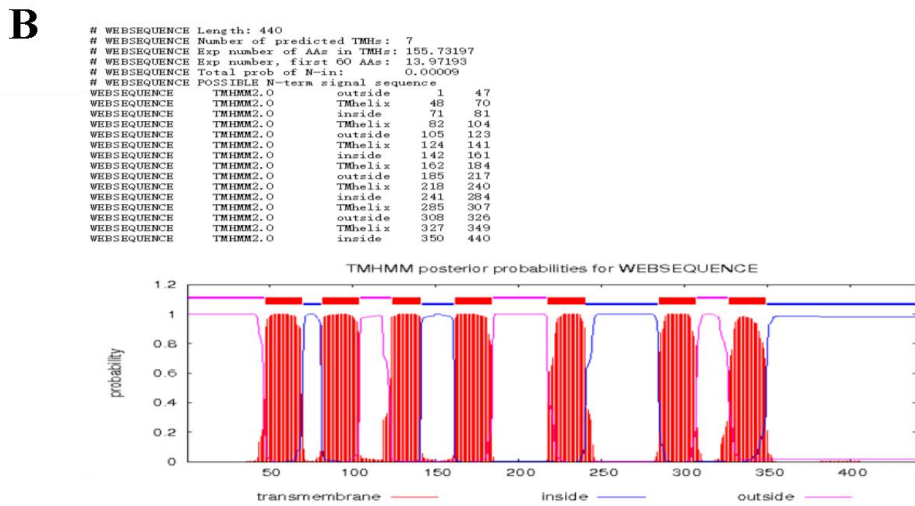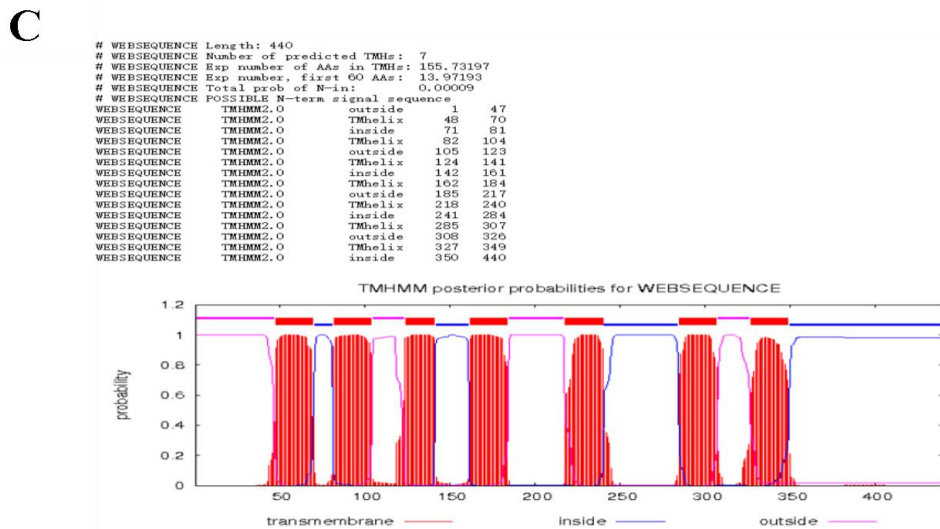

**Fig.S1.** Seven transmembrane region of NPFFR1, NPFFR2-1 and NPFFR2-2. (A) NPFFR1. Transmembrane region of the spotted sea bass amino acids sequence. (B) and (C) NPFFR2-1 and NPFFR2-2.
